# Supplementary material for: Dinuclear Tb and Dy complexes supported by hybrid Schiff-base/calixarene ligands: synthesis, structures and magnetic properties
Source: Royal Society of Chemistry journal article supplement (doi:10.1039/d0dt02209h), 2020-01-01
Supplement: d0dt02209h1.pdf [file d0dt02209h1.pdf]

## **Dinuclear Tb and Dy Complexes supported by hybrid Schiff-Base/Calixarene Ligands: Synthesis, Structures and Magnetic Properties**

Peter Hahn,<sup>a</sup> Steve Ullmann,<sup>a</sup> Jennifer Klose,<sup>a</sup> Yan Peng,<sup>b</sup> Annie K. Powell,<sup>b</sup> Berthold Kersting<sup>a</sup>

<sup>a</sup> *Institut für Anorganische Chemie, Universität Leipzig, Johannisallee 29, D-04103 Leipzig, Germany. E-mail: b.kersting@uni-leipzig.de; Fax: +49/(0)341-97-36199*

<sup>b</sup> *Institute of Inorganic Chemistry, Karlsruhe Institute of Technology, Engesserstrasse 15, D-76131 Karlsruhe, Germany. E-mail: annie.powell@kit.edu*

### **Supporting Information**

#### **Contents**

1. Characterization of compounds
  - a) NMR spectroscopy
  - b) ESI-MS spectrometry
  - c) IR spectroscopy
2. X-ray crystallography
3. SQUID magnetometry

## 1. Characterization of compounds

### a) NMR spectroscopy (for $H_3L^2$ )

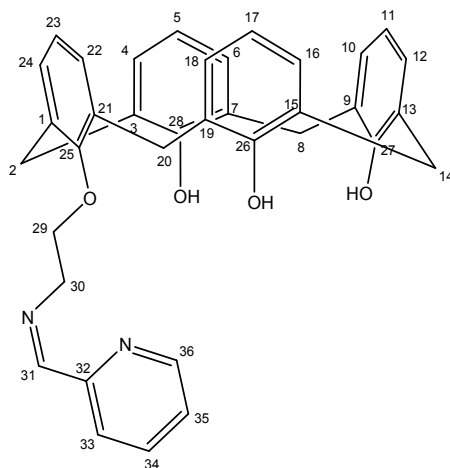

**Figure S1.** Labeling scheme of  $H_3L^2$  used for assignment of  $^1H$  and  $^{13}C$  NMR signals.

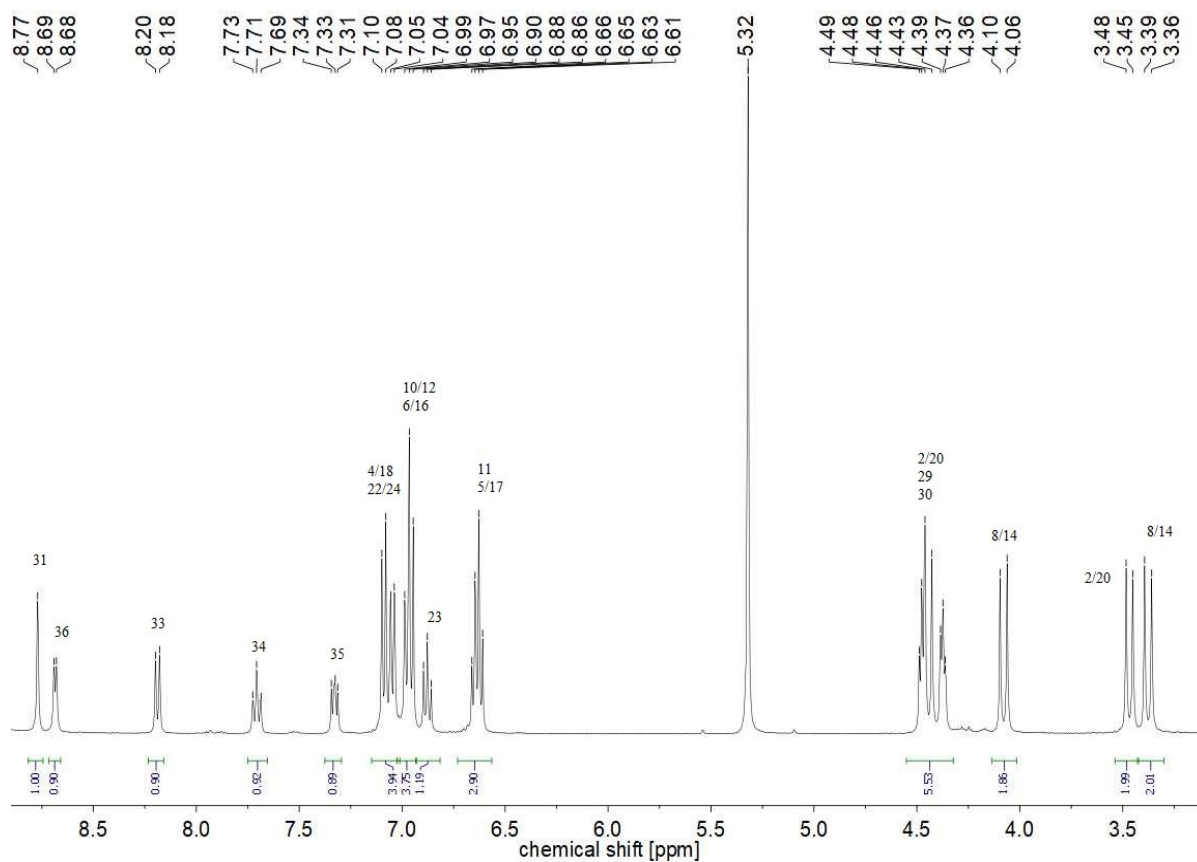

**Figure S2.**  $^1H$  NMR spectrum of  $H_3L^2$  in  $CD_2Cl_2$  at ambient temperature.

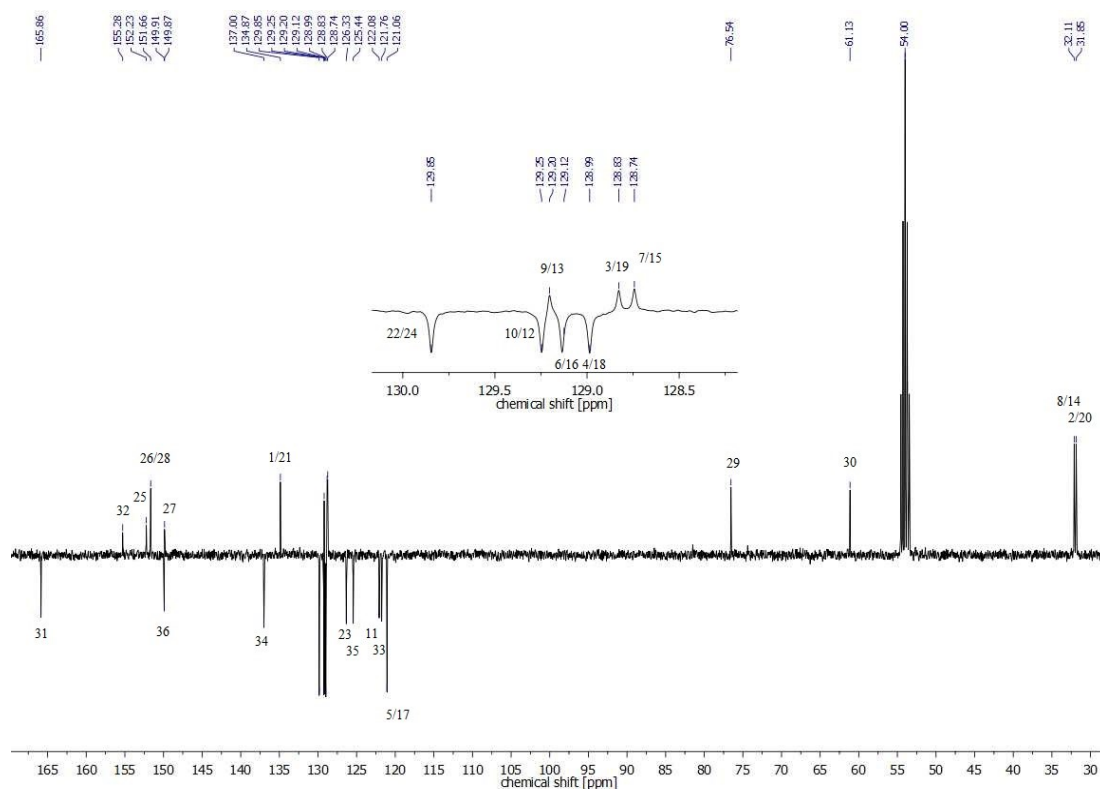

**Figure S3.** APT NMR spectrum of  $H_3L^2$  in  $CD_2Cl_2$  at ambient temperature. The inset shows the spectral range between 128 ppm and 130 ppm.

**b) ESI-MS-spectrometry**

Ligand  $H_3L^2$

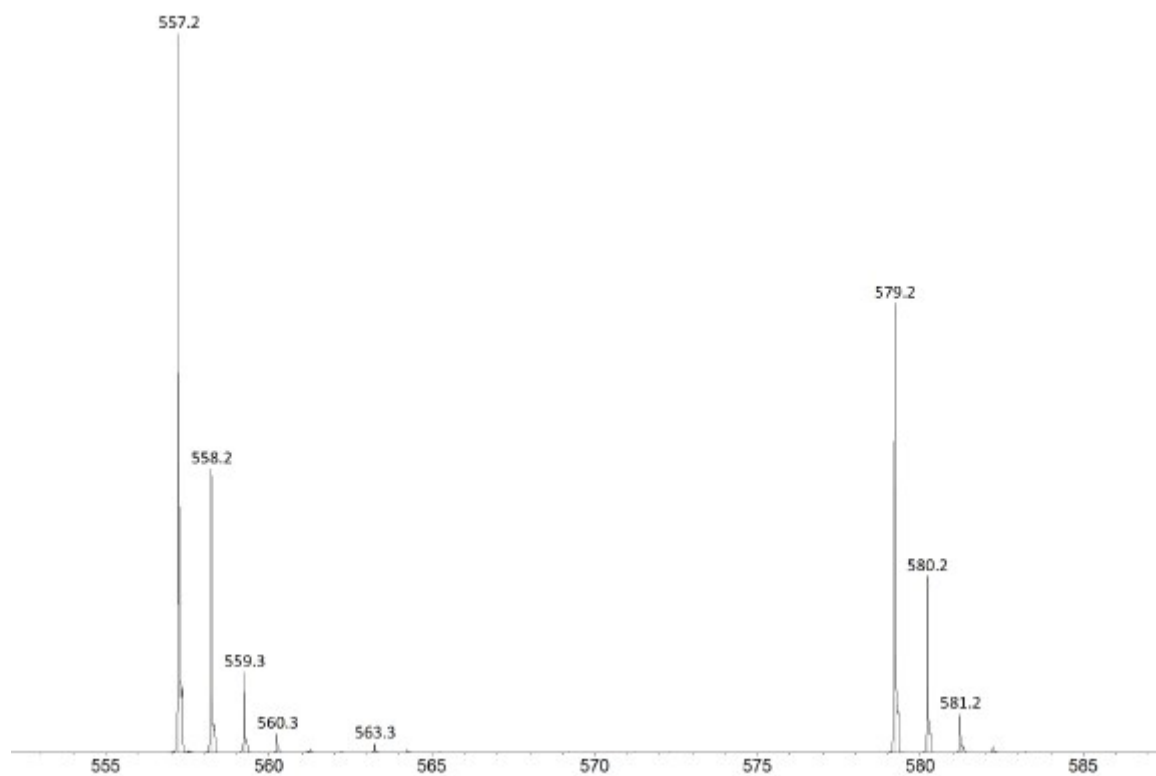

**Figure S4.** ESI(+)-MS of  $H_3L^2$  in MeCN in the  $m/z$  range 555-585.

Complex  $[\text{HNEt}_3][\text{Dy}_2(\text{HL}^1)(\text{L}^1)]$  (**5**).

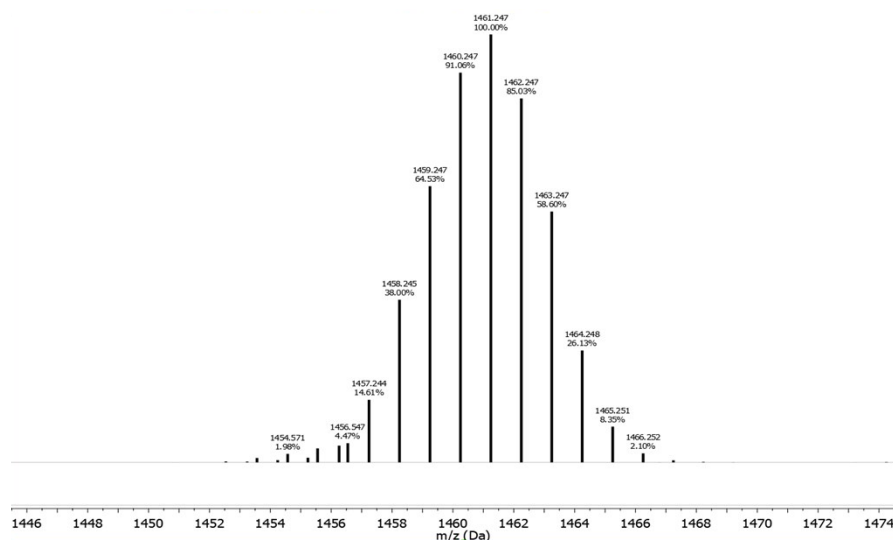

**Figure S5.** ESI(-)-MS of  $[\text{HNEt}_3][\text{Dy}_2(\text{HL}^1)(\text{L}^1)]$  (**5**) in MeCN in the  $m/z$  range 1446-1474.

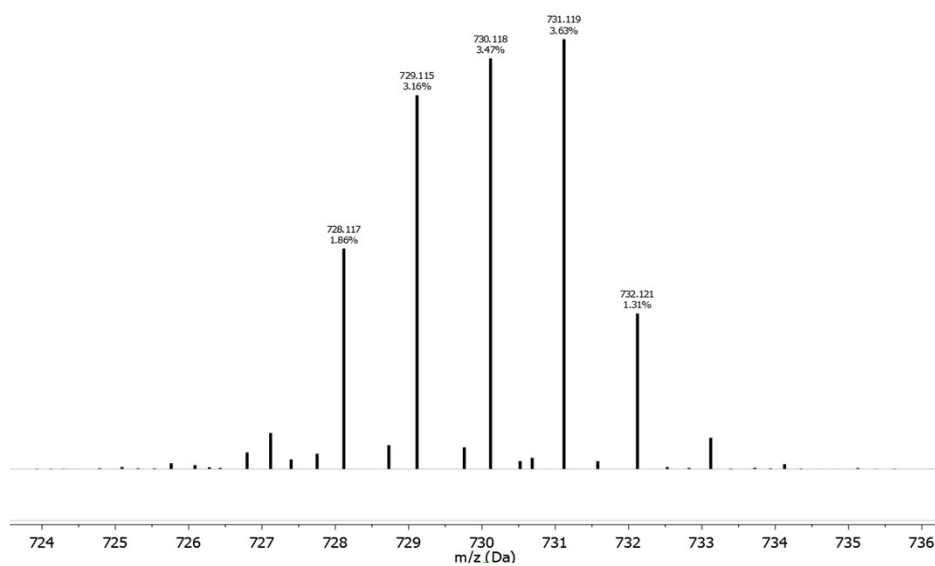

**Figure S6.** ESI(-)-MS of  $[\text{HNEt}_3][\text{Dy}_2(\text{HL}^1)(\text{L}^1)]$  (**5**) in MeCN ( $m/z$  724-736).

Complex  $[\text{Tb}_2(\text{L}^2)_2] \cdot 4\text{MeCN}$  (**7**).

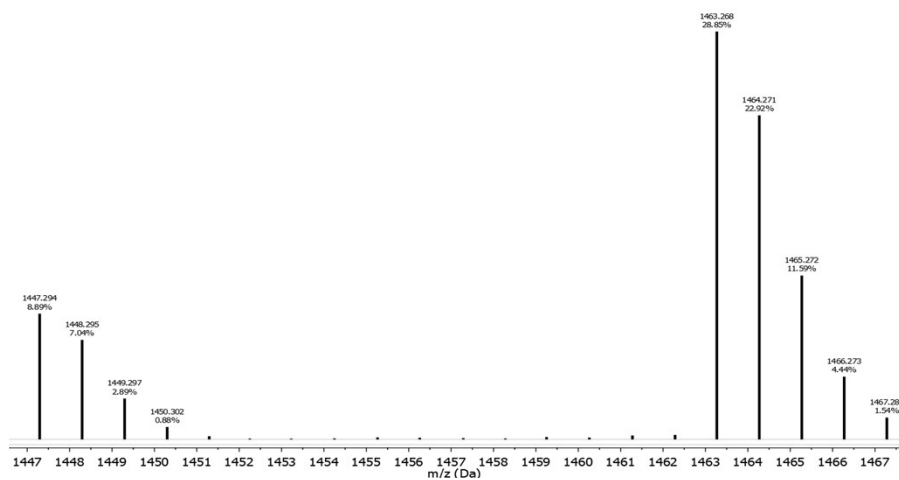

**Figure S7.** ESI(+)-MS of  $[\text{Tb}_2(\text{L}^2)_2] \cdot 4\text{MeCN}$  (**7**) in MeCN ( $m/z$  1447-1468).

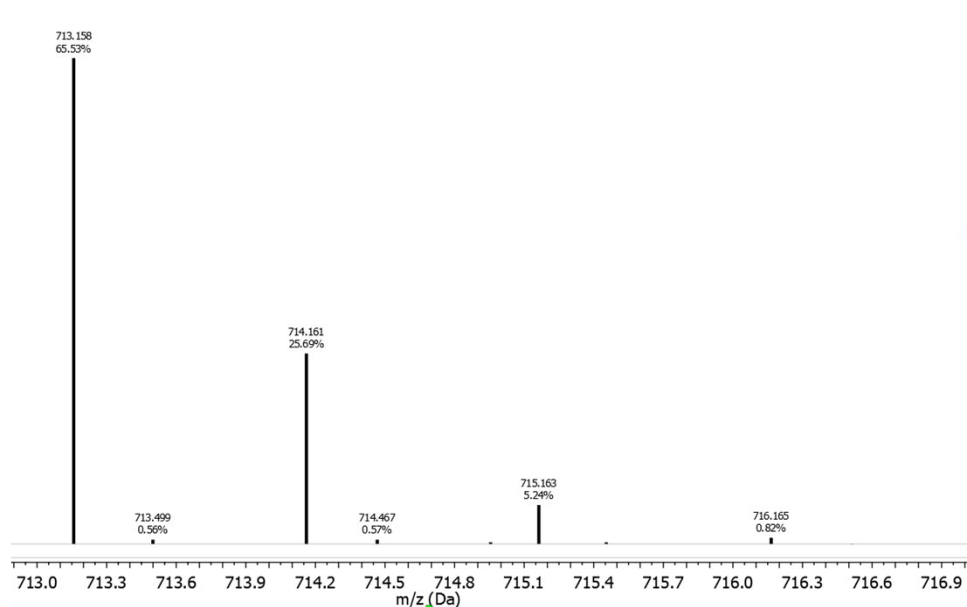

**Figure S8.** ESI(+)-MS of  $[\text{Tb}_2(\text{L}^2)_2] \cdot 4\text{MeCN}$  (**7**) in MeCN ( $m/z$  713-717).

Complex  $[\text{Dy}_2(\text{L}^2)_2] \cdot 4\text{MeCN}$  (**8**).

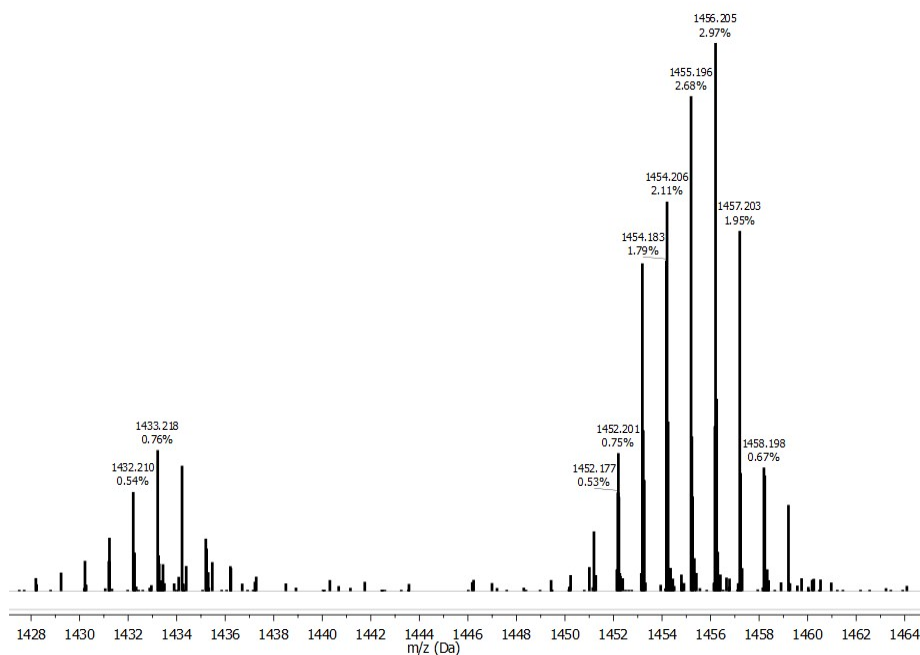

**Figure S9.** ESI(+)-MS of  $[\text{Dy}_2(\text{L}^2)_2] \cdot 4\text{MeCN}$  (**8**) in MeCN ( $m/z$  1428-1464).

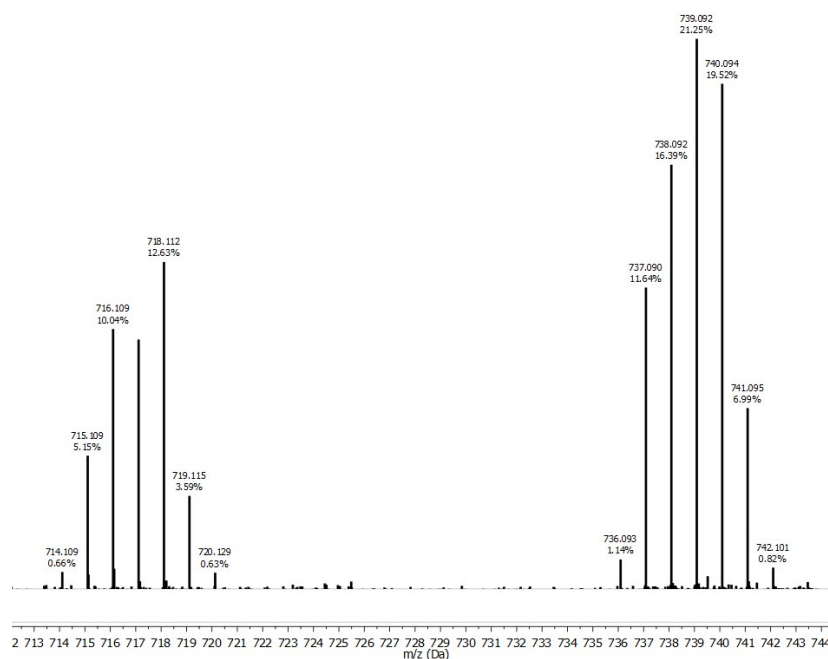

**Figure S10.** ESI(+)-MS of  $[\text{Dy}_2(\text{L}^2)_2] \cdot 4\text{MeCN}$  (**8**) in MeCN ( $m/z$  713-743).

**c) FT-IR spectra**

Complex  $[\text{HNEt}_3][\text{Dy}_2(\text{HL}^1)(\text{L}^1)]$  (**5**).

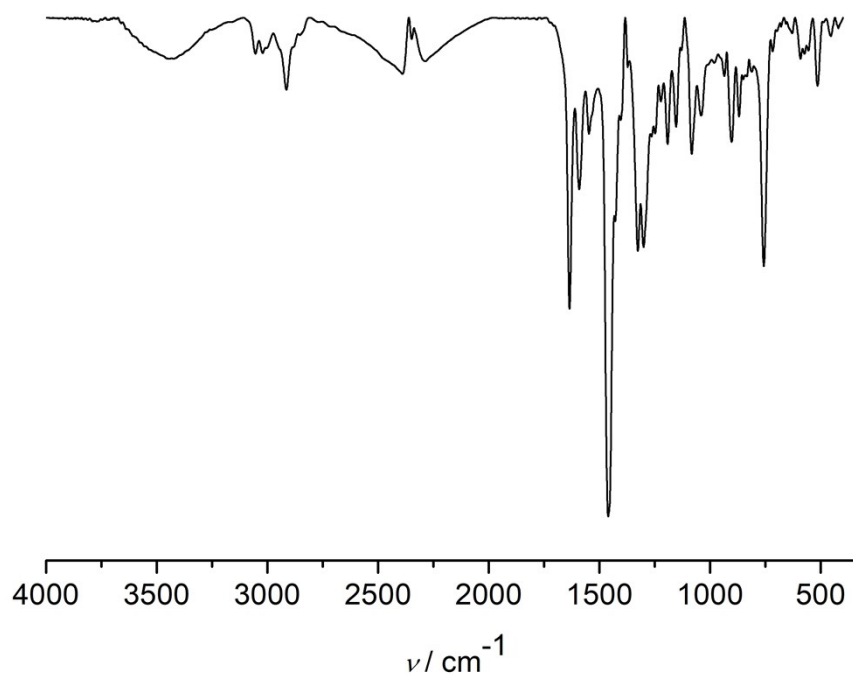

**Figure S11.** FT-IR spectrum of  $[\text{HNEt}_3][\text{Dy}_2(\text{HL}^1)(\text{L})]$  (**5**).

Ligand  $\text{H}_3\text{L}^2$ , Complexes  $[\text{Tb}_2(\text{L}^2)_2] \cdot 4\text{MeCN}$  (**7**) and  $[\text{Dy}_2(\text{L}^2)_2] \cdot 4\text{MeCN}$  (**8**).

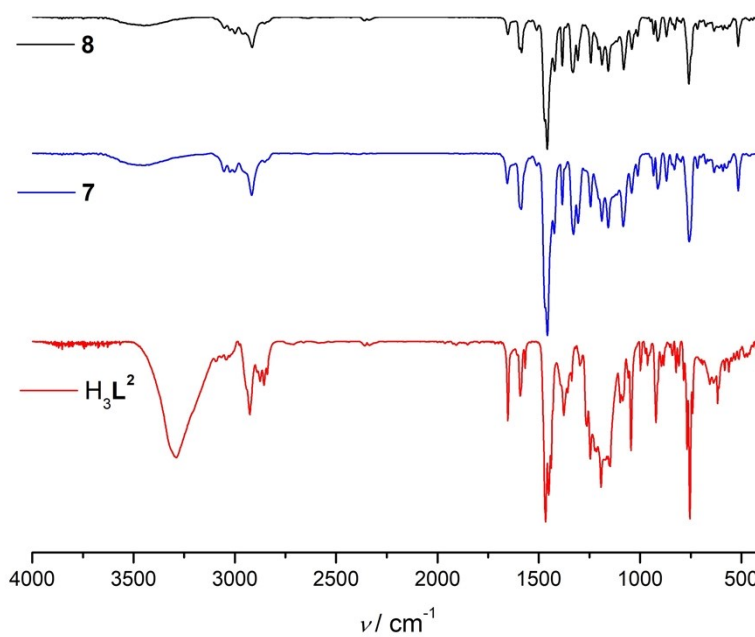

**Figure S12.** FT-IR spectra of  $\text{H}_3\text{L}^2$ ,  $[\text{Tb}_2(\text{L}^2)_2] \cdot 4\text{MeCN}$  (**7**) and  $[\text{Dy}_2(\text{L}^2)_2] \cdot 4\text{MeCN}$  (**8**).

## 2. X-ray crystallography

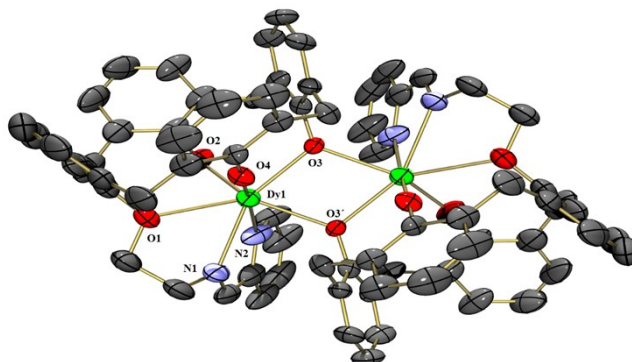

**Figure S13.** ORTEP representation of the molecular structure of the neutral Dy<sub>2</sub> complex in crystals of [Dy<sub>2</sub>(L<sup>2</sup>)<sub>2</sub>] $\cdot$ 4MeCN (**8** $\cdot$ 4MeCN). Thermal ellipsoids are shown at the 30% probability level. MeCN molecules omitted for clarity.

### Coordination Geometries

Determination of coordination geometries of the lanthanide ion in complexes **3**, **7**, and **8** utilizing SHAPE<sup>1</sup>: According to SHAPE, deviations from ideal coordination geometry are represented by a factor, that increases upon increasing distortions from the ideal geometry, for which the deviation factor is zero.

#### Compound (HNEt<sub>3</sub>)[Gd<sub>2</sub>(HL<sup>1</sup>)(L<sup>1</sup>)] (**3**)<sup>2</sup>

Gd1:

Pentagonal bipyramid: Gd1: 4.519,

Capped octahedron: Gd1: 2.257

Capped trigonal prism: Gd1: 2.616

Johnson pentagonal bipyramid: 7.260

Gd2:

Pentagonal bipyramid: 4.050

Capped octahedron: 2.368

Capped trigonal prism: 2.369

Johnson pentagonal bipyramid: 6.941

According to SHAPE, the coordination geometry of the seven-coordinate Gd1 atom is intermediate between capped octahedral or capped trigonal prismatic. The same applies to the



seven-coordinate Gd<sup>2+</sup> ion (2.368). Complex **5** is assumed to be isostructural to complex **3** and to exhibit similar coordination environments.

**Compound [Tb<sub>2</sub>(L<sup>2</sup>)<sub>2</sub>]·4MeCN (7·4MeCN):**

Several coordination environments were considered for the seven-coordinate Tb<sup>III</sup> ions in **7**. Of these, the capped octahedral environment appears to show the smallest deviation from the ideal value. However, the differences to the capped trigonal prismatic environment are not very pronounced:

Pentagonal bipyramid: 6.647

Capped octahedron: 4.191

Capped trigonal prism: 4.535

Johnson pentagonal bipyramid: 10.593

**Compound [Dy<sub>2</sub>(L<sup>2</sup>)<sub>2</sub>]·4MeCN (8·4MeCN):**

Several coordination environments were considered for the seven-coordinate Dy<sup>III</sup> ions in **8**. Of these, the capped octahedral or trigonal prismatic environment appear to show the smallest deviation from the ideal values. However, as above, the differences are not very pronounced:

Pentagonal bipyramid: 6.241

Capped octahedron: 4.169

Capped trigonal prism: 4.429

Johnson pentagonal bipyramid: 10.325

### 3. Squid Magnetometry

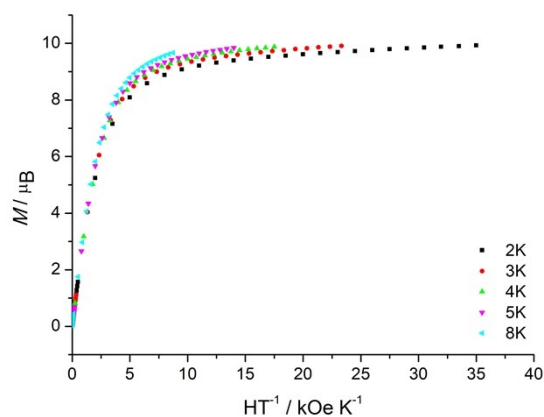

**Figure S14.** Plot of  $M$  versus  $H/T$  for  $[\text{HNEt}_3][\text{Dy}_2(\text{HL}^1)(\text{L}^1)]$  (**5**) at temperatures at or below 8 K.

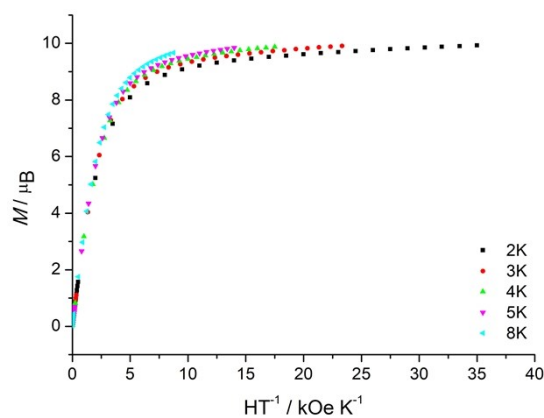

**Figure S15.** Plot of  $M$  versus  $H/T$  for  $[\text{Tb}_2(\text{L}^2)_2]$  (**7**) at temperatures at or below 8 K.

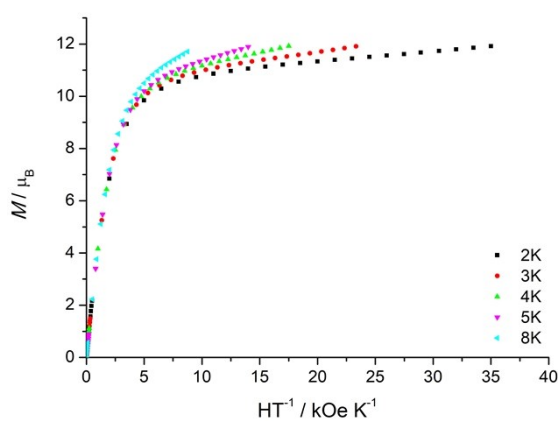

**Figure S16.** Plot of  $M$  versus  $H/T$  for  $[\text{Dy}_2(\text{L}^2)_2]$  (**8**) at temperatures at or below 8 K.

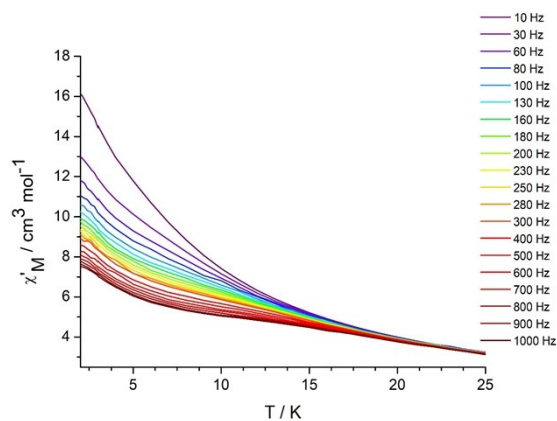

**Figure S17.** Frequency dependence of the in-phase ( $\chi'$ ) ac susceptibility from 2 to 25 K under an applied static field (3000 Oe) at indicated frequencies for the Dy<sup>III</sup><sub>2</sub> complex **5**.

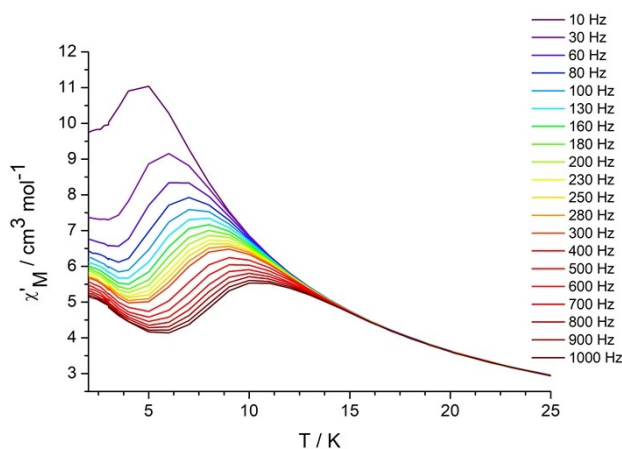

**Figure S18.** Frequency dependence of the in-phase ( $\chi'$ ) ac susceptibility from 2 to 25 K under an applied static field (3000 Oe) at indicated frequencies for the Dy<sup>III</sup><sub>2</sub> complex **8**.

#### Analysis of the AC susceptibility data.

The AC susceptibility data  $\chi_{AC}(\omega)$  for **5** and **8** were analyzed utilizing the program CC-FIT2,<sup>3</sup> which fits the in-phase and out-of phase susceptibility data simultaneously using the Cole-Cole expression eq. 1,<sup>4</sup> where  $\chi_S$  represents the adiabatic susceptibility,  $\chi_S$  is the isothermal susceptibility,  $\omega$  is defined as  $2\pi\nu$ ,  $\tau$  is the magnetic relaxation time, and  $\alpha$  is the Cole-Cole parameter ( $0 < \alpha < 1$ ) quantifying the width of the  $\tau$  distribution.

$$\chi_{AC}(\omega) = \chi_S + (\chi_T - \chi_S) / ((1 + i\omega\tau)(1 - \alpha)) \quad (1)$$

The experimental  $\chi_{AC}(\omega)$  curves for **5** were fitted applying eq 1 and are plotted as the

$\chi'(\omega), \chi''(\omega)$  and Cole-Cole plots in Fig. S19. Table S1 lists the parameters obtained. As can be seen, the Cole-Cole plots reveal a distorted semi-circular form. Also the Cole-Cole parameter varies from 0.40 to 0.53 within the temperature range from 5 – 14 K indicating a wider distribution of relaxation time or more than one relaxation process in **5**. Unfortunately, analysis of the Cole-Cole plot at low temperature is not accessible with our setup. Thus, only the high-temperature regime of the Cole-Cole could be fitted. A plot of the corresponding relaxation times versus reciprocal temperature, reveals an Arrhenius-like behaviour (eq. 2, Fig. S20), with an effective energy barrier  $U_{\text{eff}}$  of 18.21 cm<sup>-1</sup> (26.2 K) and a pre-exponential factor ( $\tau_0 = 3.11 \cdot 10^{-5}$  s).

$$\tau = \tau_0 \exp(U_{\text{eff}}/kT) \quad (2)$$

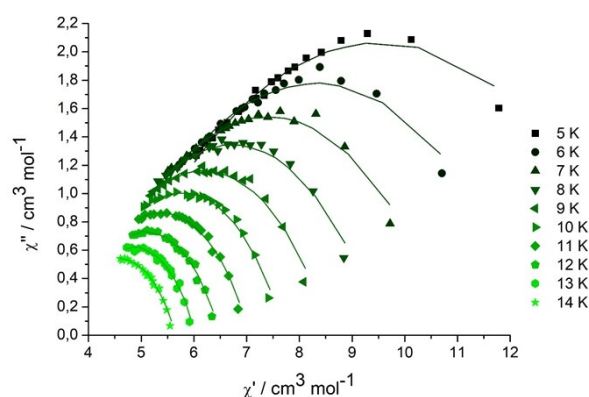

**Figure S19.** Cole-Cole plot for the Dy<sup>III</sup><sub>2</sub>-compound **5** (for 3 kOe).

**Table S1.** Parameters resultant from fitting AC data of complex **5** (for 3 kOe).

| T (K) | $\chi_S$ (cm <sup>3</sup> /mol) | $\chi_T$ (cm <sup>3</sup> /mol) | T       | $\alpha$ | Residual |
|-------|---------------------------------|---------------------------------|---------|----------|----------|
| 5     | 4.25445                         | 14.8098                         | 0.00301 | 0.5260   | 0.10594  |
| 6     | 4.12336                         | 12.5088                         | 0.00188 | 0.4894   | 0.09491  |
| 7     | 4.00687                         | 10.8243                         | 0.00122 | 0.4599   | 0.06436  |
| 8     | 3.89747                         | 9.54153                         | 0.00083 | 0.4347   | 0.04238  |
| 9     | 3.80368                         | 8.57150                         | 0.00061 | 0.4242   | 0.03903  |
| 10    | 3.81234                         | 7.71339                         | 0.00045 | 0.3935   | 0.01957  |
| 11    | 3.71898                         | 7.05402                         | 0.00033 | 0.3926   | 0.01205  |
| 12    | 3.70361                         | 6.48964                         | 0.00026 | 0.3874   | 0.01053  |
| 13    | 3.71413                         | 6.02764                         | 0.00022 | 0.3756   | 0.01068  |
| 14    | 3.53645                         | 5.64504                         | 0.00016 | 0.3994   | 0.00700  |
|       |                                 |                                 |         |          |          |

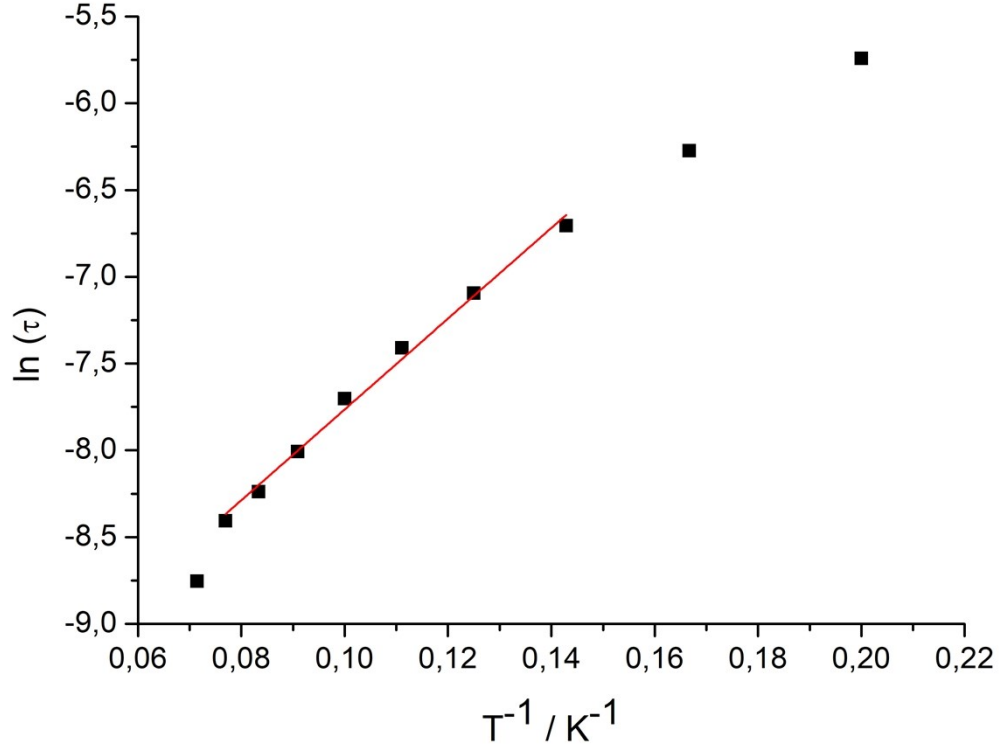

**Figure S20.** Fitting of the relaxation time for **5** using the Arrhenius law eq. 2.

The plot of  $\ln(\tau)$  vs  $1/T$  shows a deviation from linearity, suggesting that a thermally activated Orbach relaxation is accompanied by other relaxation mechanisms (Raman and direct relaxation). On these grounds we tried to fit the entire range of temperature-dependent relaxation employing eq. 3, which enables the determination of the contributions from the other spin-lattice mechanisms. However, this invariably proved unsuccessful, and so the  $U_{\text{eff}}$  values determined above for the high-temperature regime (7-13K, Fig. S20) represent only an estimate and should be taken indicative rather than definitive.

$$\tau^{-1} = AT^n + \tau_0^{-1} \exp\left(-\frac{U_{\text{eff}}}{k_B T}\right) + CT^m \quad (3)$$

Equation 3 includes three terms to account for the temperature-dependence of direct ( $AT^n$ ), Orbach (second term), two-phonon Raman relaxation processes ( $CT^m$ ). The exponent  $m$

describes the difference in the temperature dependence of Raman process for Kramers and non-Kramers ions (Kramers ions:  $m = 9$ ; non-Kramers ions:  $m = 7$ ).<sup>5</sup> The direct process often reveals a linear or quadratic dependence on the temperature, the exponents  $n$  being 1 or 2.<sup>6</sup>

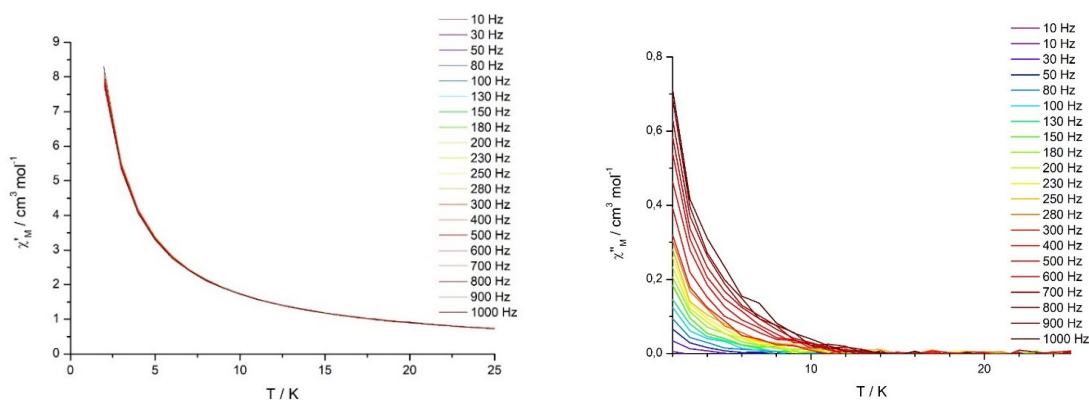

**Figure S21.** Temperature dependence of the in-phase (up) and out-of-phase (down) components of the ac magnetic susceptibility of  $[\text{Dy}_2(\text{L}^2)_2]$  (**8**) in zero dc field.

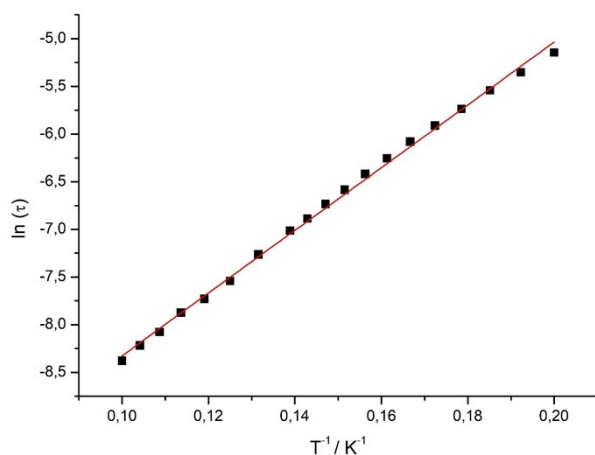

**Figure S22** Fitting of the relaxation time for **8** using the Arrhenius law eq. 2.

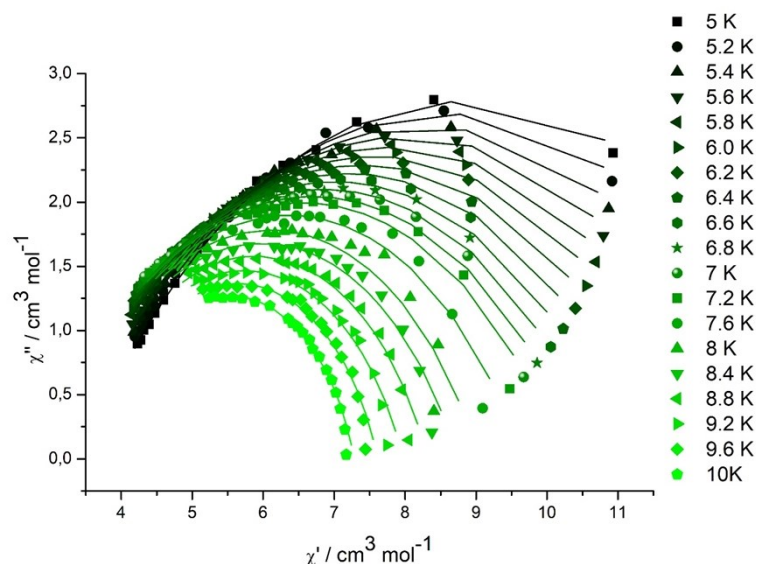

**Figure S23.** Plots of Cole-Cole fitting at selected temperatures (solid line for fitting) for compound **8**.

**Table S2.** Parameters resultant from fitting AC data of complex **8** (for 3 kOe).

| T (K) | $\chi_S$ (cm <sup>3</sup> /mol) | $\chi_T$ (cm <sup>3</sup> /mol) | $\tau$  | $\alpha$ | Residual |
|-------|---------------------------------|---------------------------------|---------|----------|----------|
| 5     | 3.46436                         | 14.2117                         | 0.00583 | 0.3915   | 0.11615  |
| 5.2   | 3.38160                         | 13.7082                         | 0.00473 | 0.3890   | 0.12000  |
| 5.4   | 3.28180                         | 13.2603                         | 0.00392 | 0.3912   | 0.12391  |
| 5.6   | 3.21674                         | 12.8263                         | 0.00323 | 0.3877   | 0.11749  |
| 5.8   | 3.12086                         | 12.4665                         | 0.00271 | 0.3905   | 0.13938  |
| 6     | 3.06852                         | 12.1129                         | 0.00229 | 0.3888   | 0.13370  |
| 6.2   | 3.00990                         | 11.7561                         | 0.00192 | 0.3867   | 0.14475  |
| 6.4   | 2.97187                         | 11.3992                         | 0.00163 | 0.3824   | 0.14086  |
| 6.6   | 2.93673                         | 11.0724                         | 0.00138 | 0.3790   | 0.14524  |
| 6.8   | 2.93824                         | 10.7525                         | 0.00119 | 0.3723   | 0.16243  |
| 7     | 2.93242                         | 10.4638                         | 0.00102 | 0.3674   | 0.15338  |
| 7.2   | 2.96237                         | 10.1776                         | 0.00090 | 0.3575   | 0.15628  |
| 7.6   | 3.06525                         | 9.6371                          | 0.00070 | 0.3338   | 0.17068  |
| 8     | 3.15645                         | 9.0317                          | 0.00053 | 0.3062   | 0.29176  |
| 8.4   | 3.22650                         | 8.7302                          | 0.00044 | 0.3029   | 0.15013  |
| 8.8   | 3.46065                         | 8.3086                          | 0.00038 | 0.2652   | 0.11763  |
| 9.2   | 3.51144                         | 7.9667                          | 0.00031 | 0.2589   | 0.94536  |
| 9.6   | 3.70218                         | 7.6063                          | 0.00027 | 0.2233   | 0.61292  |
| 10    | 3.80555                         | 7.274                           | 0.00023 | 0.1962   | 0.29441  |

## References

- [1] M. Llunell, D. Casanova, J. Cirera, P. Alemany, S. Alvarez, SHAPE version 2.1, University of Barcelona, Barcelona, 2013.

- [2] S. Ullmann, P. Hahn, A. Mehnert, C. Laube, B. Abel, B. Kersting, *Dalt. Trans.* **2019**, 48, 3893–3905.
- [3] D. Reta, N. F. Chilton, *Phys. Chem. Chem. Phys.*, **2019**, 21, 23567-23575.
- [4] M. Grahl, J. Kotzler, I. Sessler, *J. Magn. Magn. Mater.* **1990**, 187, 90-91.
- [5] R. C. Mikkelsen, H. J. Stapleton, *Phys. Rev.* **1965**, 140, 1968-1982.
- [6] K. R. Meihaus, S. G. Minasian, W. W. Lukens, Jr., S. A. Kozimor, D. K. Shuh, T. Tyliszczak, J. R. Long, *J. Am. Chem. Soc.* **2014**, 136, 6056–6068.
